# Supplementary material for: Real-time adaptive planning method for radiotherapy treatment delivery for prostate cancer patients, based on a library of plans accounting for possible anatomy configuration changes
Source: PubMed Central journal article supplement (PMC6394960; doi:10.1371/journal.pone.0213002), 2019-02-28
Supplement: pone.0213002.s002.pdf [file pone.0213002.s002.pdf]

## Appendix B

Table 4: IG-IMRT hypofractionation treatment representing the worst scenario analysis case. Target and OAR doses for the volume fractions for which the requirements reported in Table 1 were imposed, for this treatment case. Note: the dose values for the objective on the prostate (D3) and those for the femurs are not reported as the dosimetric objectives were always satisfied in our analysis.

| Dose values corresponding to dosimetric requirements |                     |                          |                                     |                               |
|------------------------------------------------------|---------------------|--------------------------|-------------------------------------|-------------------------------|
|                                                      | PTV planning method | Adaptive planning method | Adaptive MU rescale planning method | PTV planning method NO motion |
| Prostate<br>D <sub>99%</sub> > 7600 cGy              | 7476                | 7758                     | 7757                                | 7952                          |
| Seminal vesicles<br>D <sub>min</sub> > 5600 cGy      | 4468                | 5943                     | 5939                                | 5594                          |
| Bladder<br>V <sub>5000 cGy</sub> < 60%               | 3946                | 4895                     | 4887                                | 5184                          |
| Bladder<br>V <sub>6500 cGy</sub> < 50%               | 4863                | 5371                     | 5370                                | 5942                          |
| Bladder<br>V <sub>6600 cGy</sub> < 40%               | 5614                | 6031                     | 6032                                | 6595                          |
| Bladder<br>V <sub>7000 cGy</sub> < 30%               | 6034                | 6640                     | 6642                                | 7205                          |
| Bladder<br>V <sub>7500 cGy</sub> < 25%               | 6381                | 6953                     | 6953                                | 7580                          |
| Bladder<br>V <sub>8000 cGy</sub> < 15%               | 7041                | 7509                     | 7509                                | 7908                          |
| Rectum<br>V <sub>6170 cGy</sub> < 50%                | 6698                | 6281                     | 6278                                | 6382                          |
| Rectum<br>V <sub>7429 cGy</sub> < 20%                | 7764                | 7592                     | 7592                                | 7632                          |
